# Supplementary material for: Toxoplasma gondii Clp family protein: TgClpB1 plays a crucial role in thermotolerance
Source: PubMed Central journal article supplement (PMC5689671; doi:10.18632/oncotarget.20989), 2017-09-18
Supplement: oncotarget-08-86117-s001.pdf [file oncotarget-08-86117-s001.pdf]

# Toxoplasma gondii Clp family protein: TgClpB1 plays a crucial role in thermotolerance

## SUPPLEMENTARY MATERIALS

|               |                                                                                                                                                                      |      |
|---------------|----------------------------------------------------------------------------------------------------------------------------------------------------------------------|------|
| <i>PfClp2</i> | ..... MTRRYLKYIYFVILLFFVQVNNVLCAPDNKQEQKYLNRITINILNAGKNIKSYGHNKLK. PIHLSALAKS. . DVGSTLFKE                                                                           | 81   |
| <i>TgClp1</i> | ..... mdadswtlvkkaflAGvecrerknpgLd. PIHLLeAmldqkqsfatqvlsq                                                                                                           | 52   |
| <i>TgClp2</i> | mLrqgcrclpLgpkavafvapearsvsnrsgcslsvlrsfstgrslifsgdfssryrgrfLgysdlLgferRprealdhprfmqascfsaaanPgfsLkgddYtdRaleaLagmslAQeYspttLelLlSLNqgedglftmimKq                    | 160  |
| Consensus     | ..... 1 1                                                                                                                                                            |      |
| <i>PfClp2</i> | NNVNAANLKEYIDIALEQTRAGAPLDNKSKIVNSAEVKETLALAEAAAANKYSPKVDVHLLSGLSND. . . LVNEIFNEVYLLDEAIKAILKRRKFEKTKKDKGKTGTLVLEQFGSMNNEKVRNGKLQGIYGRDEEIRAIIESLLRYNKNNSPVLVGNPG   | 238  |
| <i>TgClp1</i> | cpqdfeqLKEEdvhIavlkfpqghPpdpf. . spnhsImavLrhAkdiqkMmndslmsadLsLiQeKeg. . irshltaagfmmkqieekavsvrgsKkiassDddanfealkkyGtdfdLaeKGLDpviGRedEIRvIriLcRrtKnnPvLiGePG      | 208  |
| <i>TgClp2</i> | agVldkLrsgvdfvErhrpvtgdnstrt. . . lgpvlqkvlssAnsrlrIqhdeyisVEHLaaLadedrsrLvrflkesklTandirAlkairgtrrvntktpevsyqslkkyGrdlTeaamanelDpviGRdKvRvrlqLlSLrtrtKnnPiiIGePG    | 317  |
| Consensus     | ll a 1 1 g g e r i l r kn p g pg                                                                                                                                     |      |
| <i>PfClp2</i> | TGKTTIVEGLVYRIEKGdVpKELQGYTVISLNFRRKFTSGTSYRGEFETRMKNIKELKNKNKIILFVDEIHLLLGAGKA. EGGTDAANLLKPVLSKGEIKLIGATTIAEYRKFIESCSAFERRFEKILVEPPSVDMTVKILRSKSKYENFYGINITDK      | 397  |
| <i>TgClp1</i> | vKsAVVEGLarIvvhDvPsnLr. crivSLdvgsliadgkFRGEFEeRltaVlqEvKdaagKILFIDEIHVLLGAGKt. EoaLDAANLLKPVLSKGEIKLIGATTIAEYRKYvEkdaAFERRFqqvhvRePSVqgTisILRqLAdrYashhcvrTlDs      | 366  |
| <i>TgClp2</i> | vgkTalaEGLAqRlvsGdPdtLaGrqLISLdlgallaCaklRGEFEeRlKsvlrEvqessgqLILFIDEIHmvvGAGsAgEsmGadAgNlKPLarGElrcIGATTIAEYRKYIEKdkALERRFvvlVdePrVedalsILRqLkerYEmhhGvsIrdS        | 477  |
| Consensus     | gk egl ri dvp l sl g rgefe r e iilf deih gag e da n lkp l ge igatt eyrk e a errf v p v ilr lk y g id                                                                 |      |
| <i>PfClp2</i> | ALVAAAKISDRIFKDRVLPDKAIDLLNKACSLFQVLSGKPRIDVTERIERLVEIISTLEKDV. . . DKVSKKYNKLIKFEFEKKEQLKYYEYVITGERLKRKKEIEKKLNDLKELTQNYVYS. NKEPPIELQNSLKEAQOQKYLELYKETVAAYVE      | 552  |
| <i>TgClp1</i> | ALVeAqlaDRyItsRFLPDKAIDLmdeAcaiarVqdsKPeavDVIERqkvqLevElialLEKek. . . DpaSqKrlaevkehlGvadaLrplYlYqgekaRidelgkLaqQdeLkakiaraqrvgdldlvaELrfdalpgvearfklqEeoeqE         | 522  |
| <i>TgClp2</i> | ALVAAcvsRyIqDRFLPDKAIDLideAaSkikievtsKPtrlDeidRkLmqLemEkisivsDmkggQdaeqqrLqLteKkmdAKEEqsrInaiveqeraeiekadlkQeideaKveqQkaereyNlnkaaqirygkipelqtqLatleaaakre           | 637  |
| Consensus     | alv a r i r lpdkaidl a kp d r l e d                                                                                                                                  |      |
| <i>PfClp2</i> | AKTHNAMNDVAVYQEHVSYYLDRSGMPLGSLSPESKGAALKLYNSLSKSIIGNEDIIKSLSDAVVKAATGMKDPKPIGTFLFLGPTGVGKTELAKTLAIELFNSKNDLIRVNMSEFTEAHSVSKITGSPPGYVGFSDGQLTEAVREKPHSVVLFDEL        | 712  |
| <i>TgClp1</i> | r. THkplltevVgpEqiadvvhRwtniPvqkLqteterfLTLgkSLaeqvIGapqavevtqAilrsAaGlsrnrPIGSLFLGPTGVGKTELCkrvAesLpdsKerLvrfdMSEymEqHSVsrliGaPPGYVghdegGQLTeiRrnPsvVLFDEv          | 681  |
| <i>TgClp2</i> | l. sssrllrDtVtaEdiaqvswtGivPsrLvegerekLLgkLndrvIGqEegvrSvaeAiqrsraGlcDPnrPiaslvFLGPTGVGKTELCkALArqLPdteeaLlrfdMSEymEqHStarliGaPPGYVgfdkgGQLTEAVRrnPsvVLFDEv          | 796  |
| Consensus     | v e p l l l l ig a g pi flgptgvgtel k a lf l r mse e hs g ppy g gqte r p sv lfde                                                                                     |      |
| <i>PfClp2</i> | EKAHADVFKVLLQILGDGYINDNRRNIDFSNTIIIMTSLGAELFKKLLFPDADNSGTEPYKRVMEDEVRLSLIKKCKVKVFPKFPVNRIDKIGVPEFLNKNLHKIIVALRFFKLEKRLKRNQVSVSEKAIDYIIDQSYDPELGAQRTLIFIESVIMTK       | 872  |
| <i>TgClp1</i> | EKAHsqVwnVLLQvLdGrItDsqgrtvDFSNTHIIITSNLGA. . . flleaAqrVdpvEpraeeaaatvmmevrKFFrPELlNRIDdIvIFkaLdvNlRqvmkLmqevreRLaEkrIeItmtrnAaDhIvkearDPayGARPlkrFIerhvsvd         | 837  |
| <i>TgClp2</i> | EKAHpeVniFLQILdGiltDshgntvsFkNcIIITSNMgsd. . . lllqAsgtkdrE. . . . . eVtqaLmeivrrhrIFELVNRmDfVvPnPLsealNfgIfdLevaLqaRLtdrrrltISVchrAkadIvaqaDfnFGARPlkrFvrravqhteltp | 945  |
| Consensus     | ekah v lq l dg d f n i i i tsn g l a e . . . . . pe nr d f i nl l ri a i dp garp                                                                                     |      |
| <i>PfClp2</i> | FAIMYLKELVDDMDVFDVYNSKAKNLVNLskT. . . . .                                                                                                                            | 906  |
| <i>TgClp1</i> | lsklkGEiFadshVvcDwdeKrrgwVtttSalevppsagrVpghveadmdesltpdsrslslgsrtdsyrnsamhetnkvkfrY                                                                                 | 927  |
| <i>TgClp2</i> | lsrlllsgsinsgrrrVgVas. . . KqeelPvssekiedskipenlqfflypqeqtaqhmLagsdtgaskdtgetaafs. . . . .                                                                           | 1020 |
| Consensus     | l v k                                                                                                                                                                |      |

Supplementary Figure 1: Polypeptide alignments of the full open reading frame of PfClp2, TgClp1 and TgClp2.

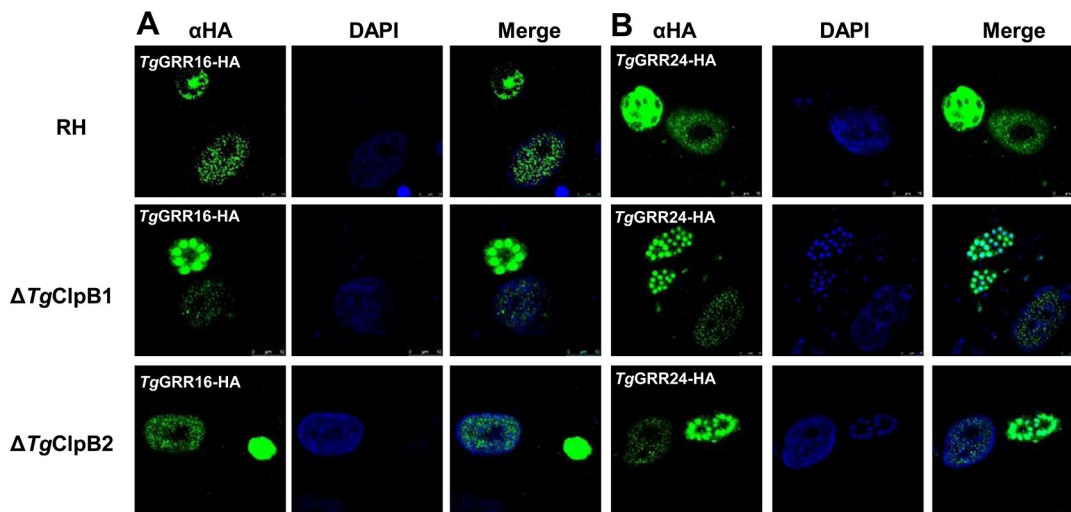

Supplementary Figure 2: Neither TgClpB1 nor TgClpB2 is not required for the translocation of TgGRA16 and TgGRA24 to the host nucleus. HFFs were infected with RH-WT, ΔTgClpB1 or ΔTgClpB2 strains expressing HA-tagged TgGRA16 (A) and TgGRA24 (B), respectively. After 24 h, the cultures were washed, fixed, and stained with antibodies to the HA tag.

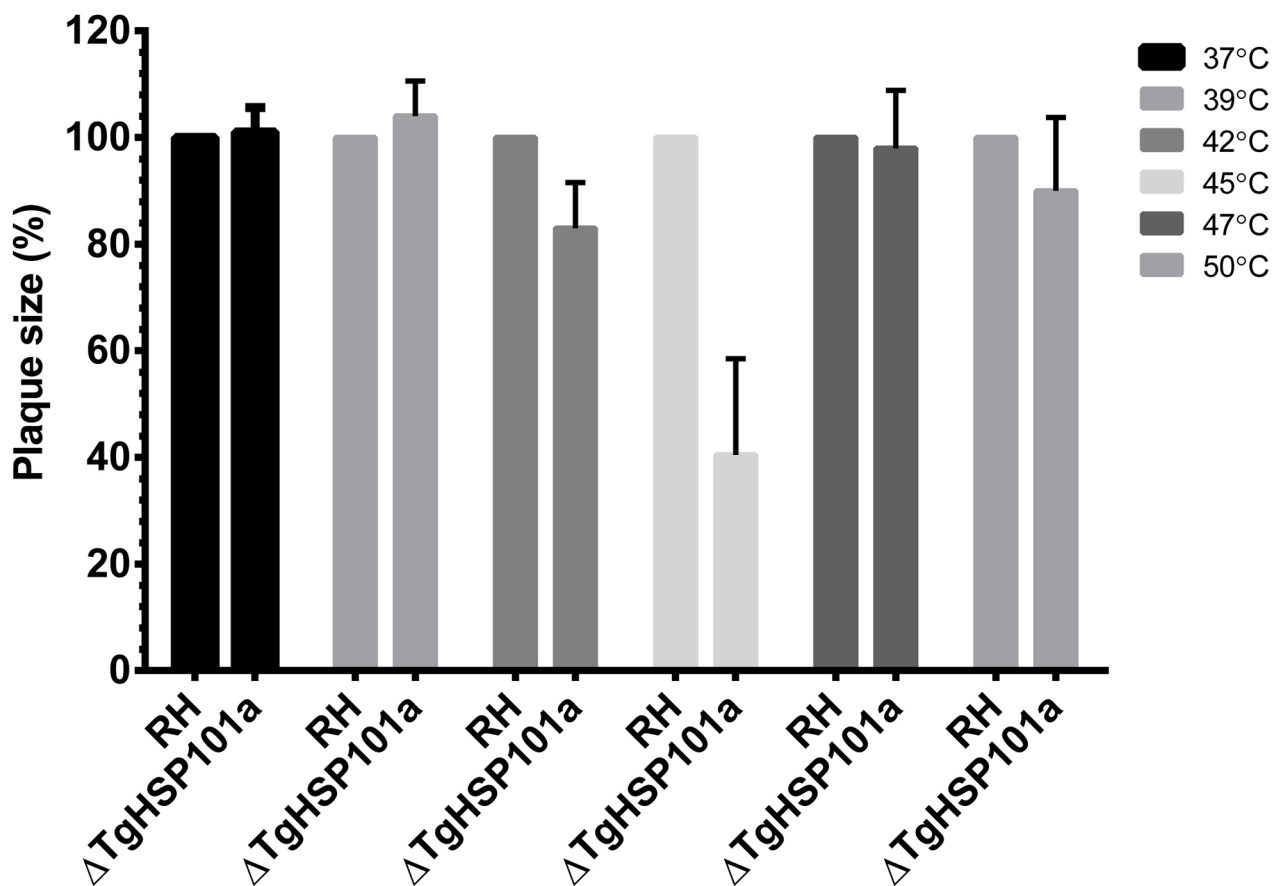

**Supplementary Figure 3: Growth analysis of the indicated parasites grown on HFF cells for 7 days.** When parasites were grown in HFF cells after the released parasites treated at 37, 39, 42, 45, 47, 50°C, plaque sizes of  $\Delta$ TgClpB1 was determined and compared with RH-WT.

**Supplementary Table 1: Primer sequences used to amplify and sequencing**

| Primer name         | Sequence                                                                       |
|---------------------|--------------------------------------------------------------------------------|
| TgClpB1_Ex_F        | AATGGGTCGCGGATCCAGCCGAACCACTCGCTCAT                                            |
| TgClpB1_Ex_R        | GGTGGTGGTGCTCGAGCACCGCAGTCAATCGCTCC                                            |
| TgClpB2_Ex_F        | AATGGGTCGCGGATCCGGTCTGCTTTGGTCTGTCTG                                           |
| TgClpB2_Ex_R        | GGTGGTGGTGCTCGAGGATGATGGGATTGTTCTTA                                            |
| TgClpB3_Ex_F        | AATGGGTCGCGGATCCATTGAGAAGGACAAGGCACT                                           |
| TgClpB3_Ex_R        | GGTGGTGGTGCTCGAGTTCGGCAGCTCTGTTTAGG                                            |
| TgHSPClpB1_gRNA_1S  | CCACTAGTTCTAGAGCGGCCGTTTAAACGAGCTCCAAGTAAGCAGAAG                               |
| TgHSPClpB1_gRNA_1aS | CGGAGCAGGAAAGACCGAAGAAGTACATCCCCATTTAC                                         |
| TgHSPClpB1_gRNA_2S  | CTTCGGTCTTTCCTGCTCCGGTTTTAGAGCTAGAAATAGC                                       |
| TgHSPClpB1_gRNA_2aS | CCGTATTACCGCCTTTGAGTGTTTAAACGAGCTGATACCGCTCGCC                                 |
| TgHSPClpB2_gRNA_1S  | CCACTAGTTCTAGAGCGGCCGTTTAAACGAGCTCCAAGTAAGCAGAAG                               |
| TgHSPClpB2_gRNA_1aS | CGGTACCTACTGCTGAAATCAACTTGACATCCCCATTTAC                                       |
| TgHSPClpB2_gRNA_2S  | GATTCAGCAGTAGGTACCGTTTTAGAGCTAGAAATAGC                                         |
| TgHSPClpB2_gRNA_2aS | CCGTATTACCGCCTTTGAGTGTTTAAACGAGCTGATACCGCTCGCC                                 |
| TgHSPClpB3_gRNA_1S  | CCACTAGTTCTAGAGCGGCCGTTTAAACGAGCTCCAAGTAAGCAGAAG                               |
| TgHSPClpB3_gRNA_1aS | GCGGGGAGTTAAGCGCCGACAAGTACATCCCCATTTAC                                         |
| TgHSPClpB3_gRNA_2S  | GTCGGCGCTTAACTCCCCGCTTTTAGAGCTAGAAATAGC                                        |
| TgHSPClpB3_gRNA_2aS | CCGTATTACCGCCTTTGAGTGTTTAAACGAGCTGATACCGCTCGCC                                 |
| TgClpB1_C_1F        | CCGCTCTAGACTAGTGGATCCATGGACGCGGACTCCTGGACGAC                                   |
| TgClpB1_C_1R        | CTTCTGCACCGAGTATGACGTGTA                                                       |
| TgClpB1_C_2F        | TACACGTCATACTCGGTGCAGGAAAG                                                     |
| TgClpB1_C_2R        | GGTACCGGGCCCCCTCGAGTCAGTATCTGAATTTCTTGACATTC                                   |
| TgClpB2_C_1F        | CCGCTCTAGACTAGTGGATCCATGCTGCGCCAGGGTTGT                                        |
| TgClpB2_C_1R        | GACAGACCAAAGCGACCTCTATATCGTGAGCTGAAATCC                                        |
| TgClpB2_C_2F        | GGATTCAGCTCACGATATAGAGGTGCTTTGGTCTGTC                                          |
| TgClpB2_C_2R        | GGTACCGGGCCCCCTCGAGTCAGTATCTGATCCTTGTAAATCCGAGAACCGAGCCGTTTCC                  |
| TgGRA16_HX_F        | AAGAAGCTTGATGGGGATATCATGTATCGAAACCACTCAGG                                      |
| TgGRA16_HX_R        | GTCGTACGGATACATGATATCTCAAGCGTAGTCTGGGACGTCGTATGGGTACATCTGATCAATTTTCC           |
| TgGRA24_HX_F        | AAGAAGCTTGATGGGGATATCATGCTCCAGATGGCAGATATAC                                    |
| TgGRA24_HX_R        | GTCGTACGGATACATGATATCTTAAAGCGTAGTCTGGGACGTCGTATGGGTAATTACCCTTAGTGGGTGGTTAAC    |
| TgPRX3_DHFR_F       | AAGAAGCTTGATGGGGATATCATGGCGGCTTGCCCTTCGAGCGGCCGTTTGTCTCTCAGACAAATGGAAGGCTTGATA |
| TgPRX3_DHFR_R       | GTCGTACGGATACATGATATCTTAAAGCATAATCTGGAACATCATATGGATAGTTTTTCAGTTGTCCAAGGTAG     |
| TgHSPClpB1_SEQ_F    | ATCGCCGGCGCCAAGTTCC                                                            |
| TgHSPClpB1_SEQ_R    | GGTAAAGCGCCTCATCTC                                                             |
| TgHSPClpB2_SEQ_F1   | AGGATGCTCCTCCTTAGTTT                                                           |
| TgHSPClpB2_SEQ_R1   | GCACGAGAAGTTCGGTTT                                                             |
| TgHSPClpB2_SEQ_F2   | AGCCCGAACTGGTAATGC                                                             |
| TgHSPClpB2_SEQ_R2   | AGTGCGGCGACTGAGGAT                                                             |

(Continued)

| Primer name    | Sequence                                                            |
|----------------|---------------------------------------------------------------------|
| TgGRA16_SEQ_F  | AACCACTCAGGGATACGGC                                                 |
| TgGRA16_SEQ_R  | CGGACTTCGCTTTGAACACTT                                               |
| TgCAS9_SEQ_1S  | CCACTAGTTCTAGAGCGGCCGTTTAAACGAGCTCCAAGTAAGCAGAAG                    |
| TgCAS9_SEQ_2AS | CCGTATTACCGCCTTTGAGTGTTTAAACGAGCTGATACCGCTCGCC                      |
| TgLucb-DHFR-1F | AAGAAGCTTGATGGGGATATCATGCTGCGCCAGGGTTGT                             |
| TgLucb-DHFR-1R | GTTTTTGGCGTCTTCCATGTAGTCATCTCCTTTCAGAG                              |
| TgLucb-DHFR-2F | CTCTGAAAGGAGATGACTACATGGAAGACGCCAAAAAC                              |
| TgLucb-DHFR-2R | GTCGTACGGATACATGATATCTTAAGCATAATCTGGAACATCATATGGATACAATTTGGACTTTCCG |
